# Supplementary material
Source: MDPI journal article supplement (https://www.mdpi.com/2073-4433/11/9/969)
Supplement: s1 [file s1]

Article

# Supplementary Information (SI) Impact of Urbanization on the Predictions of Urban Meteorology and Air Pollutants over Four Major North American Cities

Shuzhan Ren <sup>1\*</sup>, Craig A. Stroud <sup>1</sup>, Stephane Belair<sup>2</sup>, Sylvie Leroyer<sup>2</sup>, Rodrigo Munoz-Alpizar<sup>2</sup>,  
Michael D. Moran <sup>1</sup>, Junhua Zhang <sup>1</sup>, Ayodeji Akingunola <sup>1</sup>, Paul A. Makar <sup>1</sup>

<sup>1</sup> Air Quality Research Division, Science and Technology Branch, Environment and Climate Change Canada,  
Toronto, Ontario, Canada

<sup>2</sup> Meteorological Research Division, Science and Technology Branch, Environment and Climate Change  
Canada, Dorval, Quebec, Canada

\* Correspondence: shuzhan.ren@canada.ca

Version September 3, 2020 submitted to Atmosphere

---

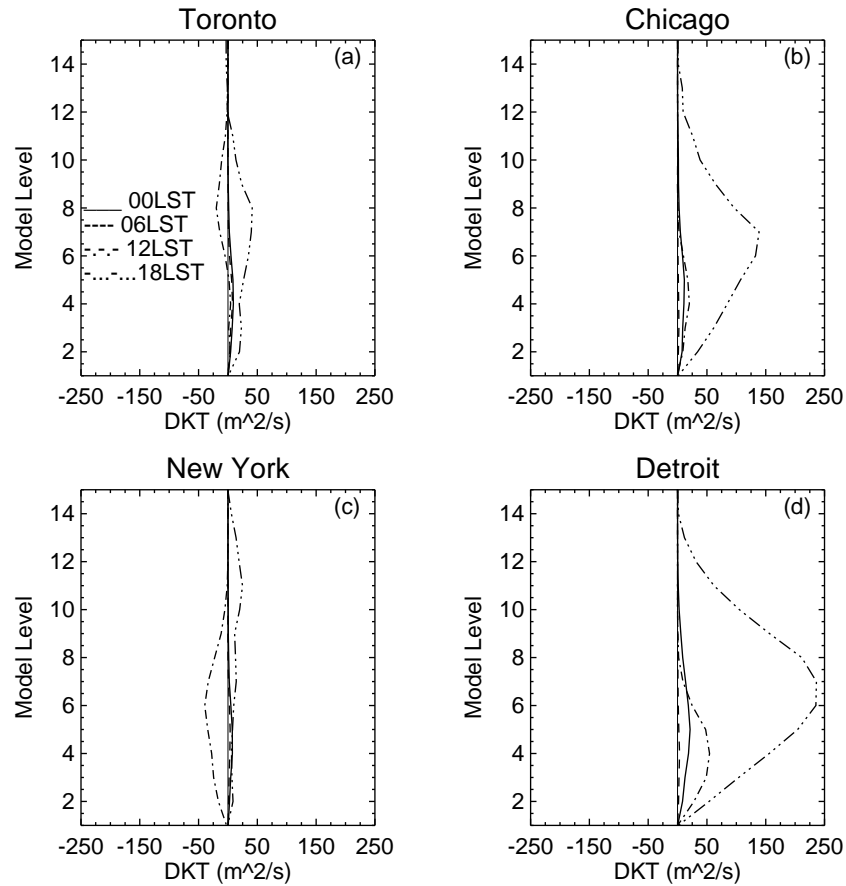

**Figure S1.** Vertical profiles of the monthly mean diffusion coefficient differences between the TEB and non-TEB simulations over July at 06, 12, 18 hour (local time) in the downtown areas of Toronto (a), Chicago (b), New York City (c), and Detroit (d). The heights of the first and the 14th level over the Toronto urban center are about 24 m and 2766 m, respectively.

### 1 Section S1: Vertical profiles of the impact on diffusivity

2 The impact of urbanization on vertical diffusivity is not limited to the levels near the surface. The  
 3 positive differences in July can reach maximum at the eighth model level (900 m) over Chicago, Detroit  
 4 and Toronto and even higher over New York City at 18:00 PM (Fig.S1). The magnitude of the impact  
 5 at this level is more than  $150 m^2/s$  over Detroit and Chicago and less than  $50 m^2/s$  over Toronto and  
 6 New York City. Around noontime, the TEB scheme provides negative differences between the first  
 7 and tenth levels over New York city and between the sixth and tenth levels over Toronto. In January  
 8 the impacts are all positive, and the largest enhancement ( $70 m^2/s$ ) appears at 18:00 PM at the sixth  
 9 level over Toronto and New York City (not shown). Because the diffusion coefficient is determined by  
 10 TKE and stability function, the vertical variation of the diffusion coefficient differences are due to the  
 11 vertical variations of the TKE and temperature differences under the influence of change of surface  
 12 momentum and heat flux as well as the reference diffusivity (of the non-TEB simulations).

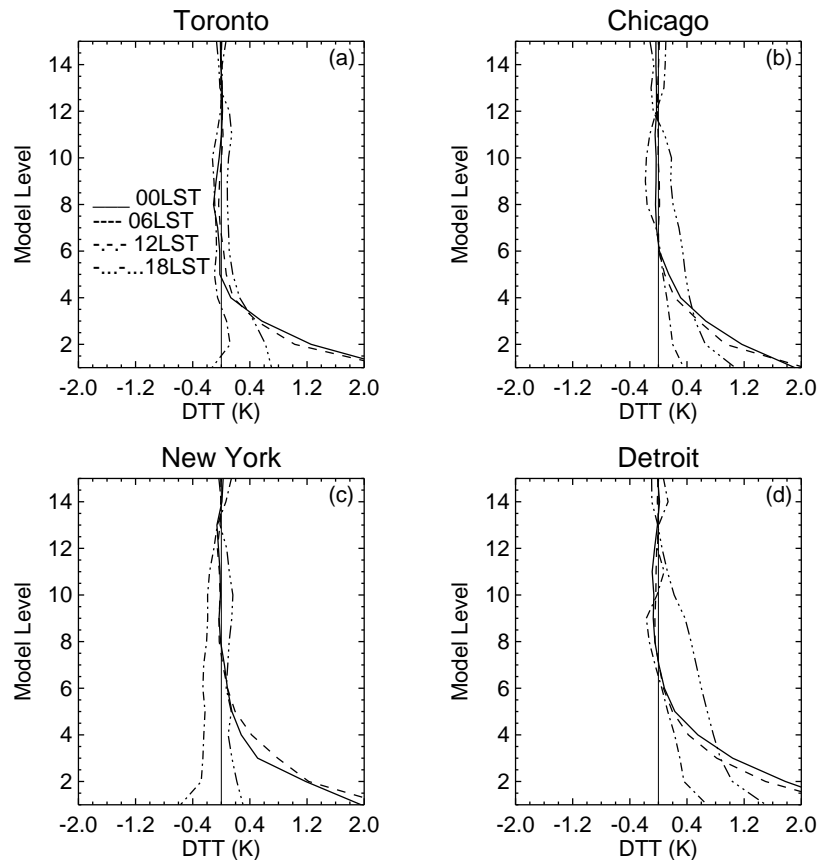

**Figure S2.** Vertical profiles of the monthly mean temperature differences between the TEB and non-TEB simulations over July at 0 6, 12, 18 hour (local time) in the downtown areas of Toronto (a), Chicago (b), New York City (c), and Detroit (d). The heights of the first and the 14th level over the Toronto urban center are about 24 m and 2766 m, respectively.

### 13 Section S2: Vertical profiles of impact on temperature

14 The impact of urbanization on temperature is not limited to the lowest model level, and it can  
 15 reach higher levels. Figure S2 shows that in summer the impact decreases as height increases, and can  
 16 reach the sixth model level (from below) which is about 600 m from ground and higher at 6:00 PM. In  
 17 winter, the impact at noontime and 18:00 PM can reach as high as the 12th model level (from below)  
 18 which is about 1800 m (not shown).

### 19 Section S3: P-O statistics of $PM_{2.5}$

20 P-O statistics show that  $PM_{2.5}$  is over predicted in both TEB and non-TEB simulations over all  
 21 the areas except the suburban area (Fig.S3). 20%-30% improvement on biases by TEB effects can be  
 22 seen over these areas. TEB effects also lead apparent improvement on RMSDs over downtown and  
 23 industrial areas, and small improvements over uptown and Lakeshore areas. Again, there is virtually  
 24 no difference in correlation coefficients between the TEB and non-TEB simulations.

25 The diurnal variation of  $PM_{2.5}$  biases and RMSD of TEB and non-TEB simulations are shown  
 26 in Fig. S4. It can be seen from the figure that both TEB and non-TEB simulations produce strong  
 27 positive biases over the downtown, uptown and industrial areas between 6:00 AM to 11:00 AM, and  
 28 big positive biases over lakeshore and suburban areas between 7:00 AM and 10:00AM. The TEB scheme  
 29 leads to big bias reduction between 8:00 PM to 8:00 AM over the downtown and industrial areas, and

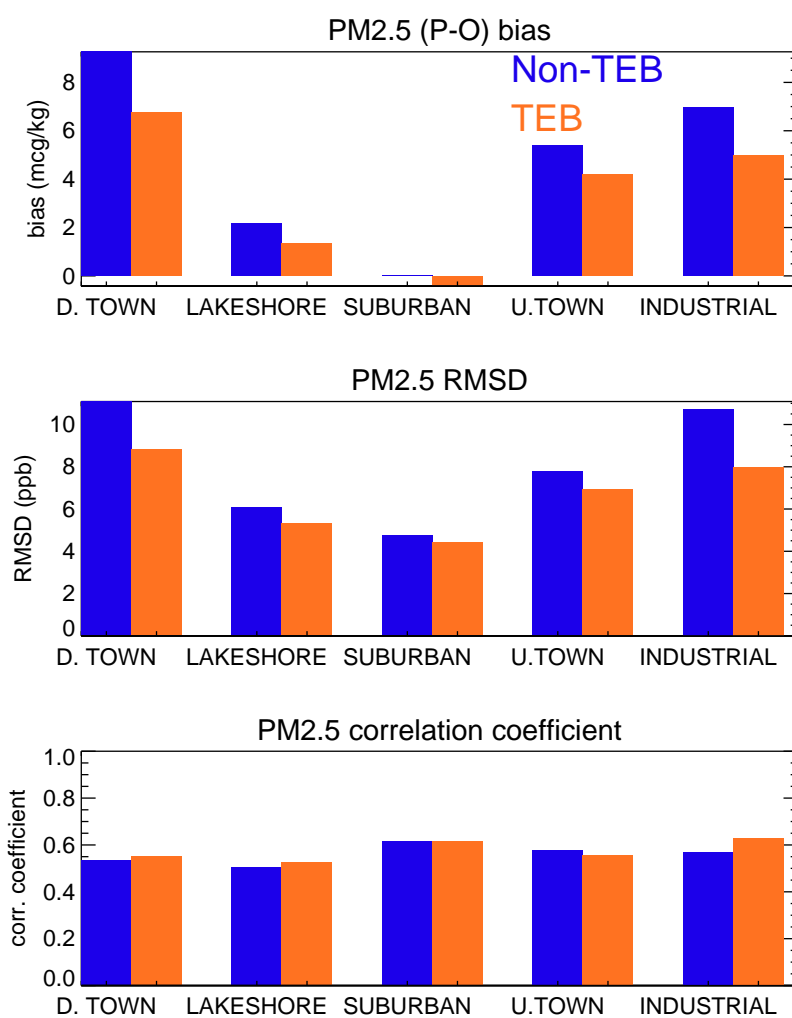

**Figure S3.** Monthly mean and hourly mean  $PM_{2.5}$  P-O biases, RMS, and correlation coefficients of simulations of TEB (orange) and non-TEB (blue).

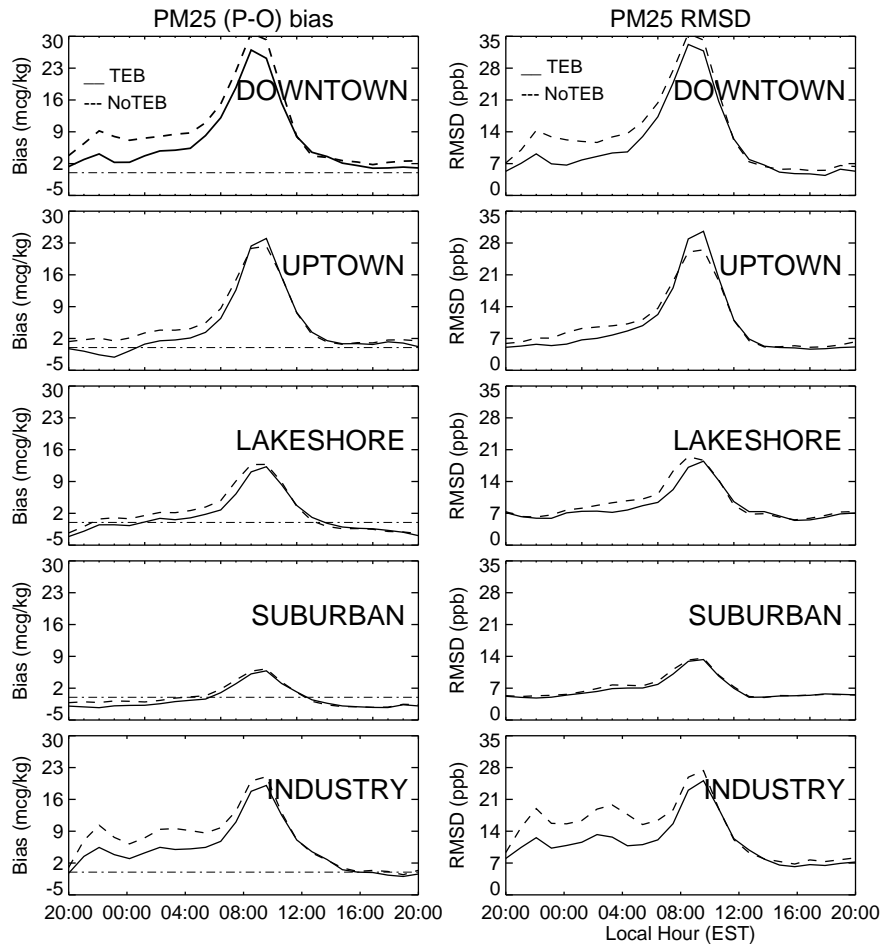

**Figure S4.** Monthly mean diurnal variation of  $PM_{2.5}$  (P-O) biases (left panel) and RMSD (right panel) for TEB (solid lines) and non-TEB (dashed lines) simulations in five areas in the GTA.

30 noticeable improvement between 0:00 AM to 8:00 AM over uptown and lakeshore areas. RMSD is also  
 31 greatly improved by the TEB scheme between 8:00 PM to 8:00 AM over downtown and industrial  
 32 areas. Improvement can be also seen over lakeshore and suburban areas between 0:00 AM to 8:00 AM.  
 33 The correlation coefficient is improved by the TEB scheme only over the downtown area between 2:00  
 34 PM to 6:00 AM (not shown).

35 © 2020 by the authors. Submitted to *Atmosphere* for possible open access publication  
 36 under the terms and conditions of the Creative Commons Attribution (CC BY) license  
 37 (<http://creativecommons.org/licenses/by/4.0/>).
